# Supplementary material for: Diminished viability of human ovarian cancer cells by antigen-specific delivery of carbon monoxide with a family of photoactivatable antibody-photoCORM conjugates
Source: Royal Society of Chemistry journal article supplement (doi:10.1039/c9sc03166a), 2019-11-20
Supplement: c9sc03166a1.pdf [file c9sc03166a1.pdf]

**Supporting Information**

**For**

**Diminished Viability of Human Ovarian Cancer Cells by Antigen-specific Delivery of Carbon Monoxide with a Family of Photoactivatable Antibody-photoCORM Conjugates**

Brian Kawahara,<sup>†</sup> Lucy Gao,<sup>§</sup> Whitaker Cohn,<sup>§</sup> Julian P. Whitelegge,<sup>§</sup> Suvajit Sen,<sup>‡</sup> Carla Janzen,<sup>‡</sup> Pradip K. Mascharak<sup>†\*</sup>

Contribution from

<sup>†</sup>Department of Chemistry and Biochemistry, University of California, Santa Cruz, CA 95064, USA

<sup>§</sup>Pasarow Mass Spectrometry Laboratory, Jane and Terry Semel Institute for Neuroscience and Human Behavior, University of California at Los Angeles, Los Angeles, CA 90095, USA

and

<sup>‡</sup>Department of Obstetrics and Gynecology, David Geffen School of Medicine, University of California at Los Angeles, Los Angeles, CA 90095, USA

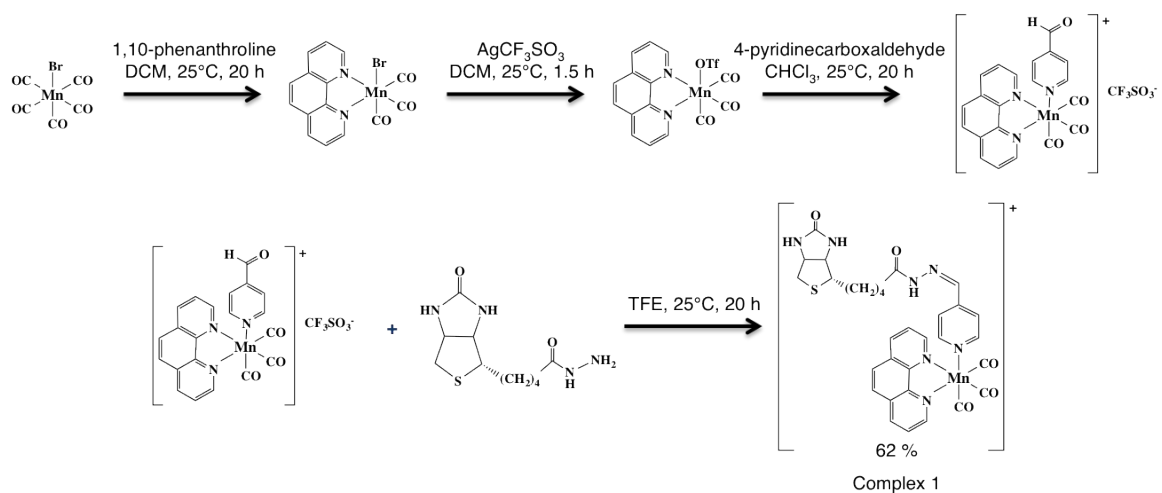

**Scheme S1.** Synthetic scheme for Complex 1: biotinylated, photoactivatable CO-releasing molecule (photoCORM).

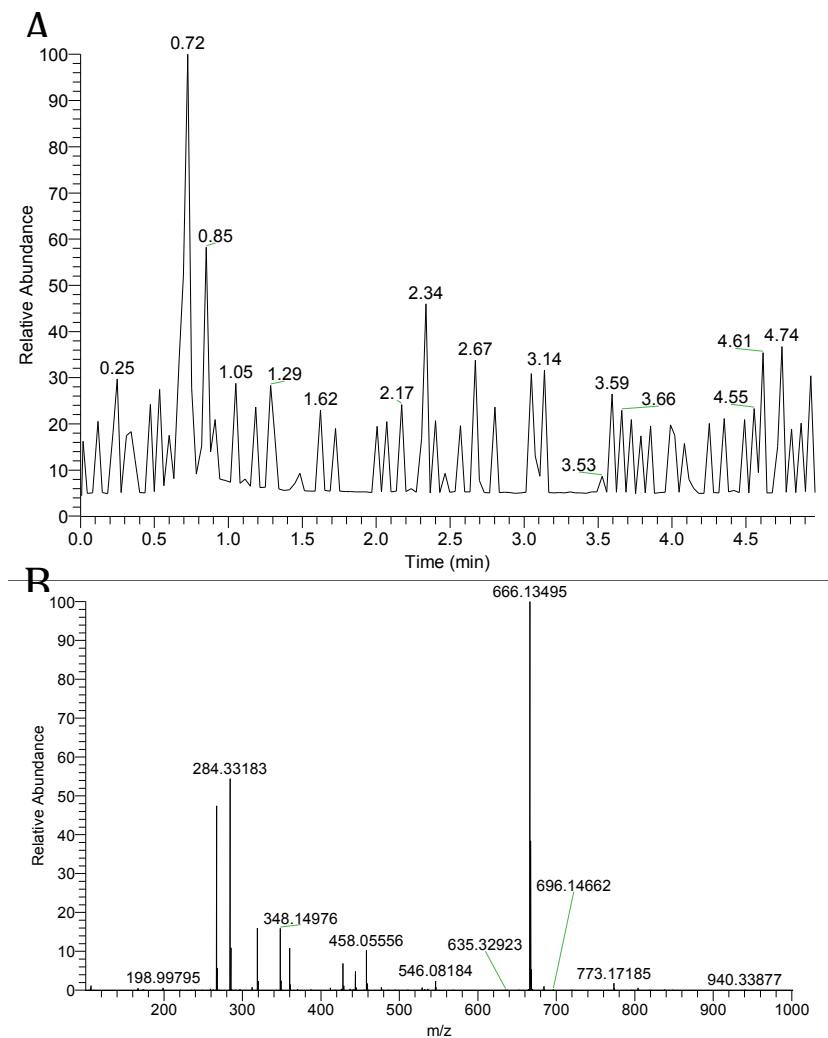

**Figure S1.** By electrospray ionization mass spectrometry (ESI-MS), (A) Total ion count (TIC) chromatogram of 0-5 min for a 5 min run of Complex **1** via flow injection analysis and (B) full mass spectrum (100-1000 m/z) for retention time=0.70-0.72. Found: 666.13495, calculated for  $C_{31}H_{29}N_7O_5SMn$  666.13314,  $\Delta$  ppm = 3.4 ppm,  $\Delta$  mDa = 2.2.

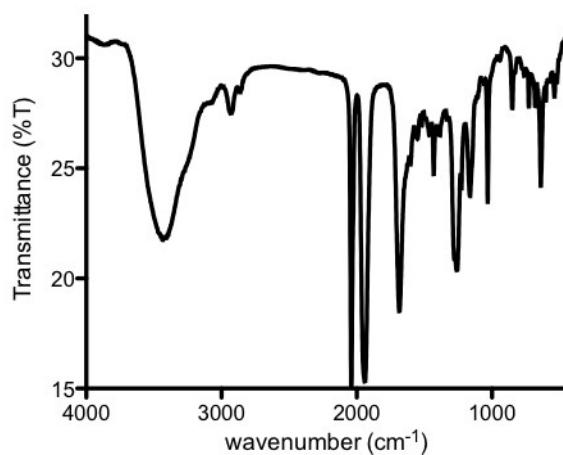

**Figure S2.** Infrared (IR) spectrum of Complex 1. IR spectrum of solid Complex 1 was recorded in KBr matrix.  $\nu_{C=O}$ : (cm<sup>-1</sup>): 2030, 1941, 1687.

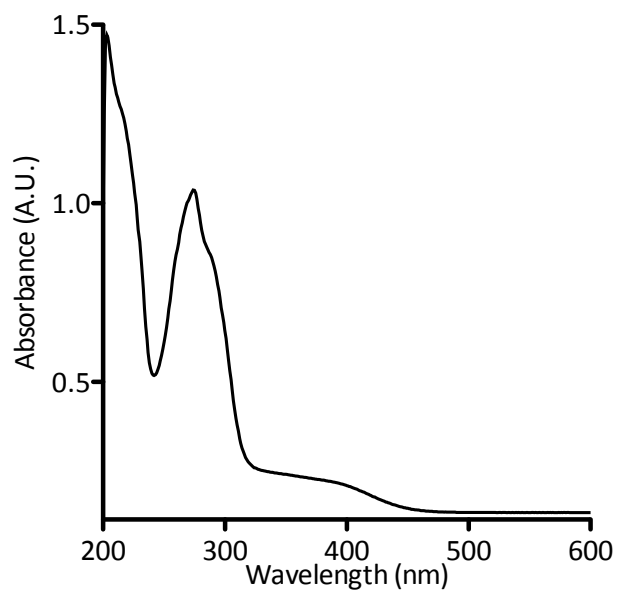

**Figure S3.** Electronic absorption spectrum of Complex 1 in 1x PBS, 25°C.

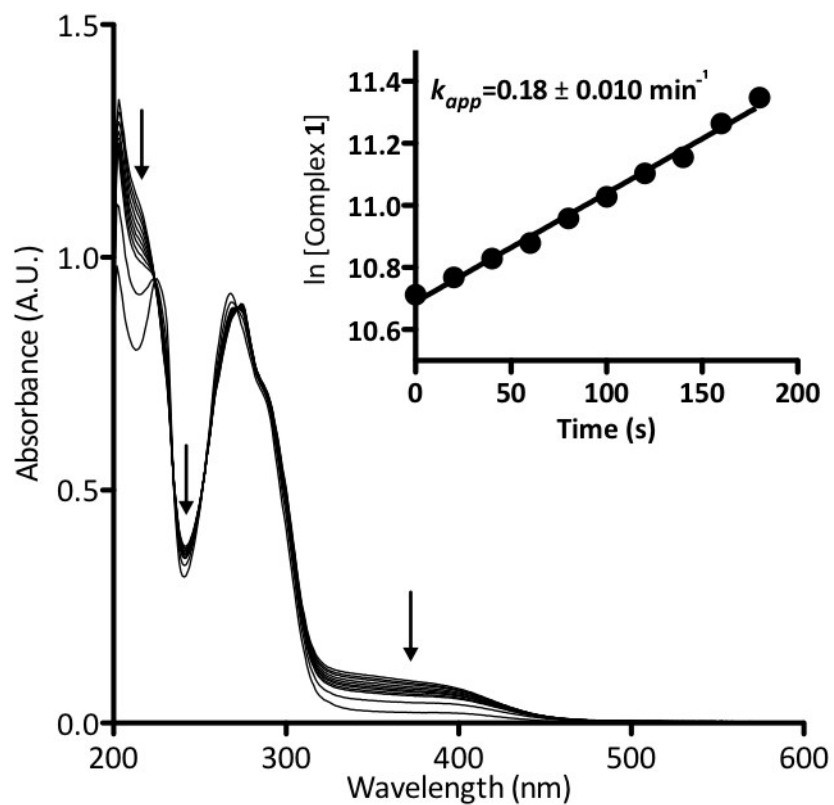

**Figure S4.** Electronic spectrum of Complex 1 upon illumination with low power (10 mW/cm<sup>2</sup>), broadband visible light in 20-second intervals. Inset: Integration of the release rate for the photodegradation of Complex 1, calculated at 390 nm, with low power (10 mW/cm<sup>2</sup>), broadband visible light for indicated time.

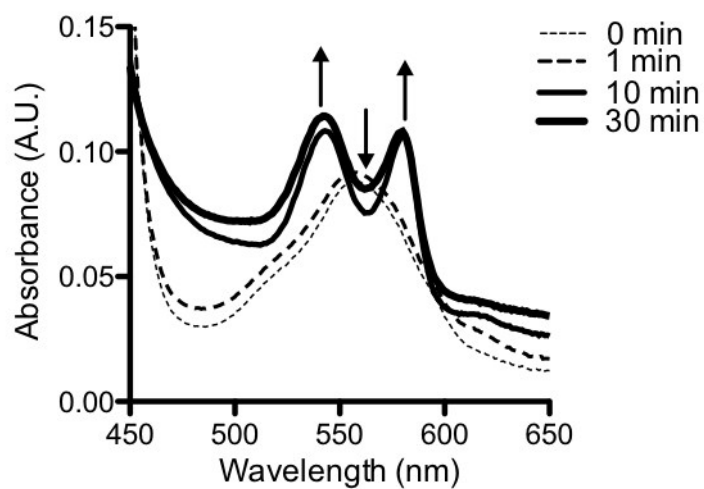

**Figure S5.** Myoglobin assay for CO release from Complex **1** dissolved and performed in 1X phosphate buffered saline (PBS), triggered by low power (10 mW/cm<sup>2</sup>), visible light for indicated time.

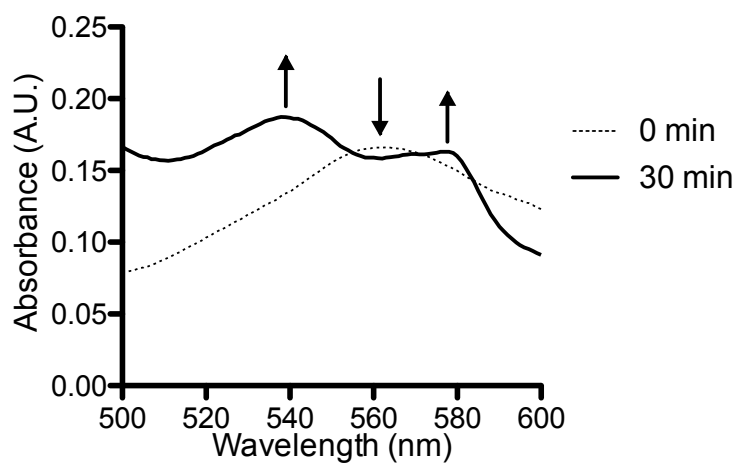

**Figure S6.** Myoglobin assay for CO release from Complex **1** dissolved in human serum and incubated for  $\geq 1$  h at 37°C, followed by exposure to low power (10 mW/cm<sup>2</sup>), broadband visible light for 30 min.

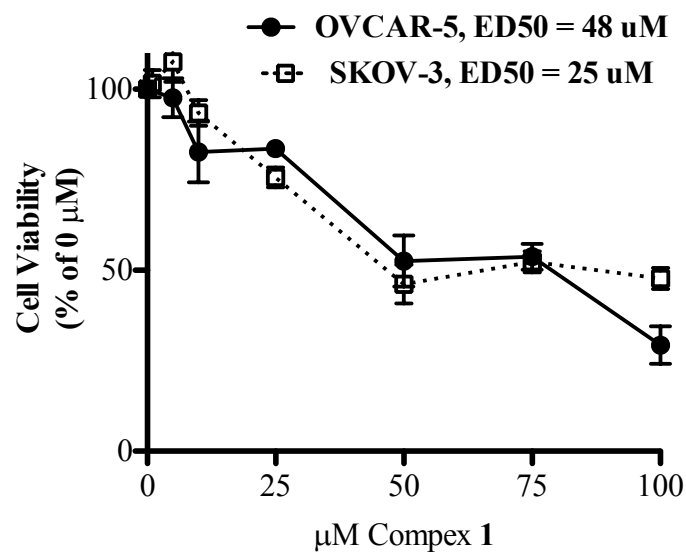

**Figure S7.** Effect of treatment of ovarian cancer cell lines with indicated concentrations of Complex 1 upon illumination with visible light on cell viability, measured 24 h post-treatment in ovarian cancer cell lines OVCAR-5 and SKOV-3. Data representative of n=3 independent experiments.

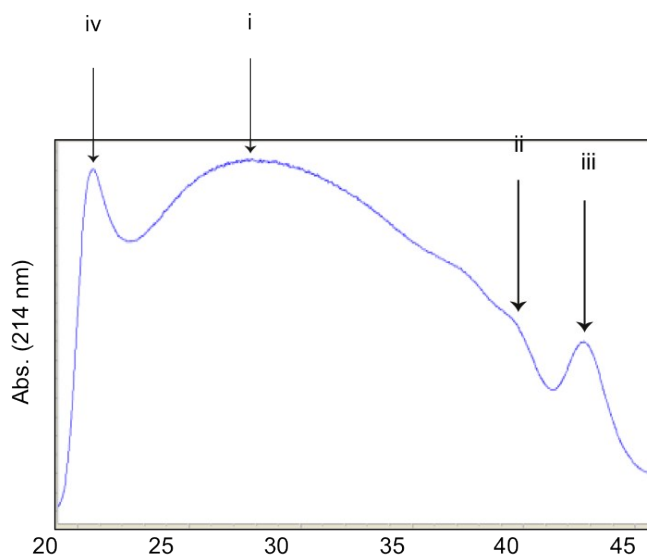

**Figure S8.** Chromatogram of Complex 2 following size exclusion chromatography. [retention time, ~molecular weight, identity] (i) [28.4 min, 366 kDa, IgG + 4 streptavidin]. (ii) [39.6 min, ~155 kDa, IgG + 0 streptavidin]. (iii) [42.7 min, ~121 kDa, IgG Fragments]. (iv) [20.6 min, ~659 kDa, void volume].

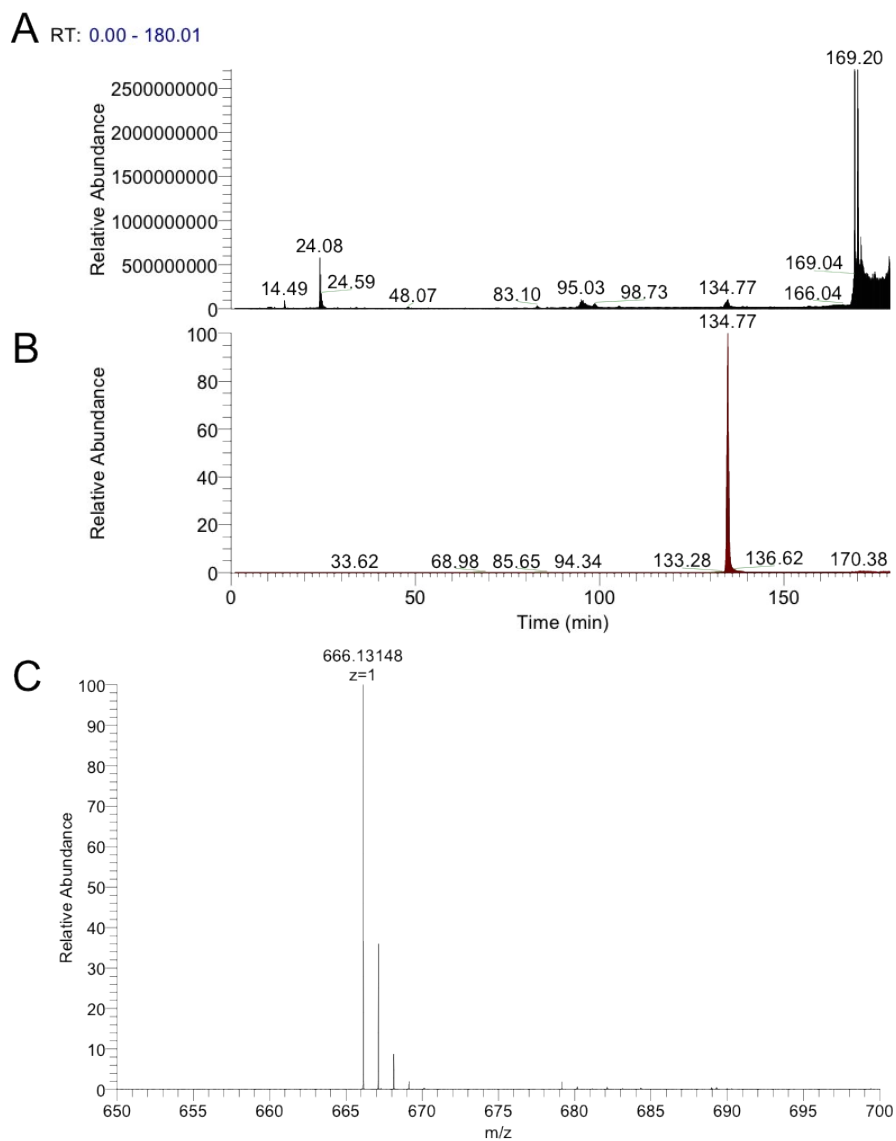

**Figure S9.** Detection of Complex 1 in tryptic digest of antibody-photoCORM conjugate (Ab-photoCORM). (A) Total ion count (TIC) of Ab-photoCORM sample. (B) Chromatogram of Ab-photoCORM, mass filter range  $m/z = 666.12593-666.13925$ . (C) Full mass spectrum at retention time 134.16-135.34 min.



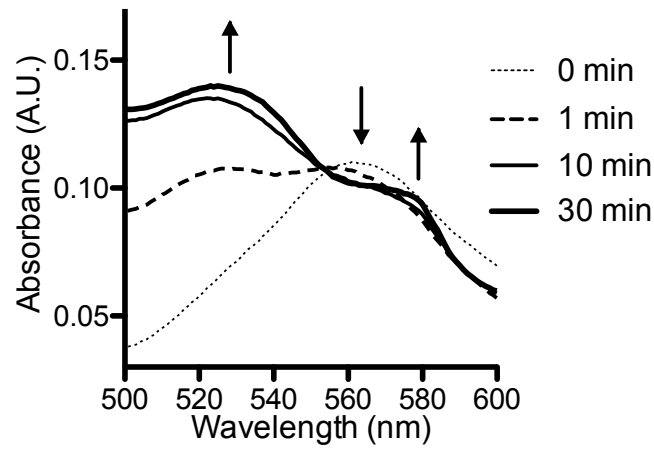

**Figure S10.** Myoglobin assay for CO release from antibody-photoCORM conjugate (Ab-photoCORM) dissolved in 1X phosphate buffered saline (PBS), triggered by low power ( $10 \text{ mW/cm}^2$ ), broadband visible light for indicated times.

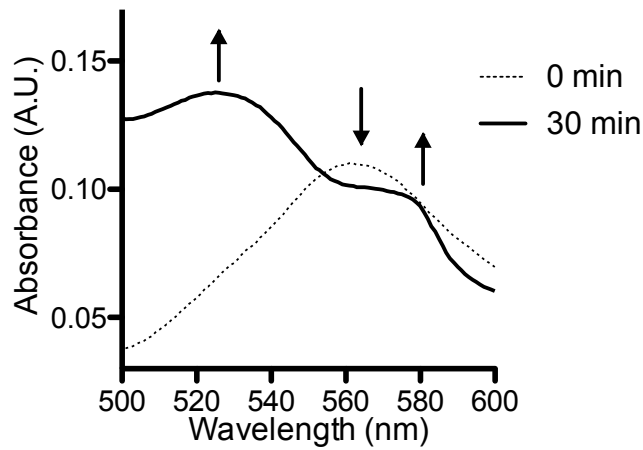

**Figure S11.** Myoglobin assay for CO release from the antibody-photoCORM conjugate (Ab-photoCORM) after  $\geq 1$  h incubation in human serum at  $37^\circ\text{C}$ , followed by exposure to low power ( $10 \text{ mW/cm}^2$ ), broadband visible light for 30 min.

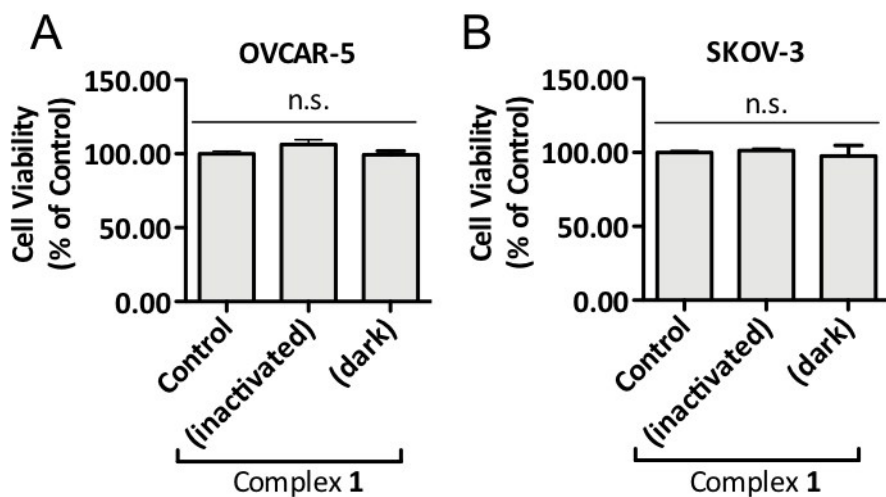

**Figure S12.** Cell viability of ovarian cancer cell lines OVCAR-5 and SKOV-3 treated with light-inactivated Complex 1 and Complex 1 in the dark to assess the cytotoxicity of non-CO components of Complex 1. Data representative of n=3 independent experiments. (\*  $p < 0.05$ )

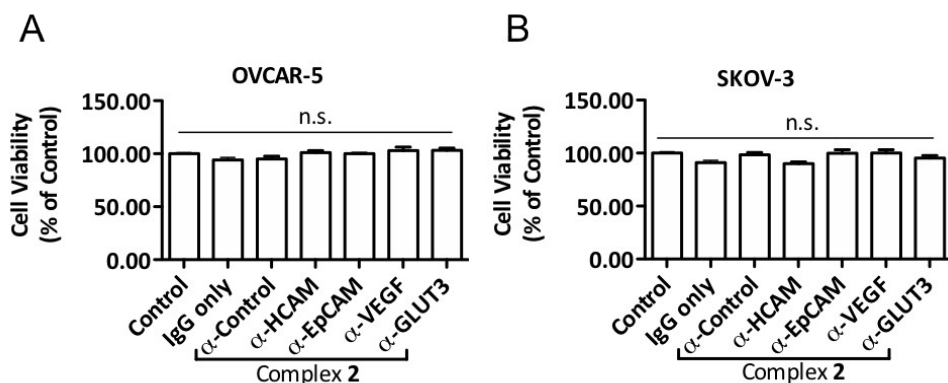

**Figure S13.** Cell viability, as measured by reduction of MTT 24 h post-treatment, of (A) OVCAR-5 and (B) SKOV-3 treated with 2  $\mu\text{g}/\text{mL}$  Complex 2 and control antibodies. Family of Complex 2 constructed from mouse monoclonal antibodies raised against human HCAM ( $\alpha$ -HCAM), EpCAM ( $\alpha$ -EpCAM), GLUT3 ( $\alpha$ -GLUT3) and VEGF-1 ( $\alpha$ -VEGF). Control treatments with vehicle control (Control), IgG without streptavidin (IgG) and Complex 2 synthesized from control mouse IgG ( $\alpha$ -Control) included. Data representative of n=3 independent experiments. (\* $p < 0.05$ )

$$\left(\frac{2-10 \mu\text{g}}{\text{Ab-photoCORM}}\right) \left(\frac{0.2 \text{ mL cell}}{\text{culture media}}\right) \left(\frac{1-4 \text{ mol streptavidin}}{1 \text{ mol Ab-photoCORM}}\right) \left(\frac{4 \text{ mol Complex 1}}{1 \text{ streptavidin}}\right) \left(\frac{3 \text{ mol CO}}{1 \text{ mol Complex 1}}\right) = \frac{\sim 23-262 \text{ pmol}}{\text{CO}}$$

**Scheme S2.** Calculations for estimation of molar release of CO from antibody-photoCORM conjugates.

## Experimental Section

### Materials

Biotin-hydrazide (A8007-100mg) was procured from Apex Biotech, Ltd. (Xuzhuang, Shaanxi, PRC). Mouse monoclonal antibodies raised against HCAM (sc-7297), EpCAM (sc-53277), GLUT3 (sc-74399), VEGF-1 (365578) and normal mouse IgG (sc-2025) were obtained from Santa Cruz Biotechnology (Santa Cruz, CA, USA). All other chemicals were purchased from Sigma-Aldrich (St. Louis, MO, USA) unless otherwise stated.

### Synthesis of biotin-photoCORM (Complex 1)

[Mn(CO)<sub>5</sub>(Br)] (100 mg, 0.36 mmol) and 1,10-phenanthroline (phen) (66 mg, 0.36 mmol) was dissolved in 25 mL dichloromethane (DCM) and allowed to stir in the dark for 20 h at 25°C. The solution, initially dark yellow, was dried down under vacuum to a yellow powder. Next, 1.5-fold excess AgCF<sub>3</sub>SO<sub>3</sub> (140 mg, 0.54 mmol) was dissolved in 20 mL DCM and added to the yellow product, and allowed to stir for 1.5 h at 25°C in the dark. The cloudy green solution was subsequently filtered through a wet Celite pad, and the filtrate was evaporated to dryness. The resulting yellow powder was dissolved in 50 mL chloroform. To that stirring solution, 4-pyridinecarboxaldehyde (pyAl) (385 mg, 3.6 mmol) was added drop wise and allowed to stir for 20 h at 25°C in the dark. The next day, the solution was dried down under vacuum, revealing orange/yellow microcrystals of [Mn(CO)<sub>3</sub>(phen)(PyrAl)]CF<sub>3</sub>SO<sub>3</sub> (155 mg, 0.27 mmol, 75%). To 223 mg (0.39 mmol) of [Mn(CO)<sub>3</sub>(phen)(PyrAl)]CF<sub>3</sub>SO<sub>3</sub>, biotin-hydrazide (100 mg, 0.39 mmol) dissolved in 20 mL of freshly distilled 2,2,2-trifluoroethanol was added, in a similar manner to a previous study.<sup>[1]</sup> The dark yellow solution was allowed to stir for 20h at 25°C in the dark. The yellow brown solution was concentrated under vacuum to ~2 mL, then chromatographed on a basic alumina column (50-200 μm particle diameter). The column was then washed with DCM (to remove unreacted [Mn(CO)<sub>3</sub>(phen)(PyrAl)]CF<sub>3</sub>SO<sub>3</sub> and biotin-hydrazide and finally Complex 1 was eluted with DCM/methanol (3/2 v/v).

<sup>1</sup>H NMR (400 MHz, [D<sub>4</sub>]-methanol): δ=1.37-1.84 (m, 6H), 2.30 (t, 2H, 7.4 Hz), 2.68 (m, 1H), 2.89 (m, 1H), 3.18 (m, 1H), 4.24 (m, 1H), 4.47 (m, 1H), 7.53 (m, 2H), 7.86 (s, 1H), 8.20 (m, 4H), 8.38 (m, 2H), 8.87 (m, 2H), 9.88 (m, 2H); IR (KBr): ν = 2039, 1939, 1685 cm<sup>-1</sup>(C=O); HRMS (ESI): *m/z* calcd for C<sub>31</sub>H<sub>29</sub>N<sub>7</sub>O<sub>5</sub>SMn: 666.13315 [*M*+]; found: 666.13539, Δ ppm = 3.4 ppm, Δ mDa = 2.2; elemental analysis calcd (%) for C<sub>31</sub>H<sub>29</sub>N<sub>7</sub>O<sub>5</sub>SMn: C 55.86, H 4.35, N 14.71,

O 12.01, S 4.80, Mn 8.26; found: C 55.84, H 4.39, N 14.71, O 12.01, S 4.80, Mn 8.25.

## Physical Measurements

$^1\text{H}$  NMR spectra of Complex **1** were collected at 298 K on a Varian Unity Inova 500 MHz instrument. FT-IR of Complex **1** was collected on a PerkinElmer Spectrum-One FT-IR. UV-vis data of Complex **1** were recorded on a Varian Cary 50 UV-vis spectrophotometer.

## Myoglobin Assay

Horse heart myoglobin was dissolved in 1X PBS, pH=7.4 to a final concentration of 50  $\mu\text{M}$  and reduced with 0.1 % sodium dithionite in quartz cuvette under aerobic conditions. In a second cuvette, Complex **1** was dissolved in 1X PBS to a final concentration of 50  $\mu\text{M}$ . Antibody-photoCORM conjugates (Ab-photoCORM) were dissolved in 1X PBS to a final concentration of 10  $\mu\text{g}/\text{mL}$ . For myoglobin assays performed in human serum, either Complex **1** or Ab-photoCORMs was dissolved to final concentrations of 50  $\mu\text{M}$  or 10  $\mu\text{g}/\text{mL}$  respectively in human serum, followed by  $\geq 1\text{h}$  incubation at 37°C. Photogenerated CO, triggered by low power, broadband visible light (10mW/cm<sup>2</sup>) from Complex **1** or Ab-photoCORM was released into the headspace and transferred to the reduced Mb solution via a cannula and positive pressure with N<sub>2</sub>(g). The extent of the conversion of Mb to carboxymyoglobin (MbCO) was monitored by the change in absorbance at 540 nm, a reliable determination of CO-release from organometallic carbonyl complexes.<sup>[2]</sup> The source of low power, broadband visible light was an IL 410 Illumination System purchased from Electro Optical Components, Inc. (Santa Rosa, CA, USA). Visible light power was measured with a Field MaxII-TO laser power meter purchased from Coherent (Palo Alto, CA, USA).

## Photolysis Experiments

The rate of CO release ( $k_{\text{CO}}$ ) for Complex **1** at 25 °C in 1x PBS was assessed with in 1 cm x 1 cm quartz cuvettes. The  $k_{\text{CO}}$  of Complex **1** (concentration = 3.0  $\times 10^{-5}$  M, 390 nm, 25°C) was determined by recording the electronic absorption spectra, monitoring changes in the spectra following exposure to light at regular intervals.  $k_{\text{CO}}$  was then calculated from the  $\ln[\text{Complex } \mathbf{1}]$  versus time ( $t$ ) plot.

## Synthetic strategy of streptavidin-conjugated mouse IgG (Complex 2)

Conjugation of 1 mg mouse IgG, either control or antigen-specific IgG, with streptavidin was performed utilizing the Streptavidin Conjugation Kit (ab102921, Cambridge, MA, USA). Native gel electrophoresis and size exclusion chromatography were used to analyze and characterize streptavidin-conjugated antibodies. Complex **2** was quantified for use in subsequent cellular studies by measuring total protein using a Pierce™ BCA Protein Assay Kit (23225, ThermoFisher Scientific, Waltham, MA).

## Native Gel Electrophoresis

2 µg of streptavidin-IgG conjugate was combined with native loading dye (62.5 mM Tris-HCl, pH=7.4, 40% glycerol and 0.01% bromophenol blue) and loaded onto a 4-12% Mini-PROTEAN TGX Precast Protein Gels (#4561095, Bio-Rad, Hercules, CA, USA) and separated under non-reducing, native conditions. Protein bands were visualized using Coomassie Brilliant Blue R-250 (#161-0436).

### **Size Exclusion Chromatography**

Separation and simultaneous UV absorbance detection at 214 nm of streptavidin-conjugated antibodies and antibody-photoCORM conjugates was performed using a 7.5 D x 60 cm, 3 µm Tosoh TSK G4000SW (stainless steel) column. The column was preconditioned with molecular weight standards. The mobile phase was prepared with 137 mM NaCl, 2.7 mM KCl, 4.3 mM Na<sub>2</sub>HPO<sub>4</sub>, 1.47 mM KH<sub>2</sub>PO<sub>4</sub>, pH = 6.8 and sterile filtered and degassed prior to use. Separation species based on size was performed at a flow rate of 0.5 mL/min, 25 °C. Fractions of streptavidin-conjugated antibodies and antibody-photoCORM conjugates were further characterized by bottom up proteomics.

### **Synthesis of antibody-photoCORM Conjugates (Ab-photoCORM)**

Complex **2** (100 µg, ~273 pmol) pre-dissolved in 500 µL 1X PBS was reacted with excess Complex **1** (40.0 ng, 60 nmol) pre-dissolved in 500 µL 1X PBS for 1h at 25°C in the dark. The antibody-photoCORM conjugates (Ab-photoCORMs) were purified using size exclusion chromatography. Bottom up proteomics and HPLC-MS/MS analysis was utilized to characterize the composition of Ab-photoCORMs. Detection of Complex **1** in Ab-photoCORMs was observed in full MS scans in the bottom up proteomic assays.

### **Bottom Up Proteomics Analysis**

10 µg of each antibody-photoCORM conjugate, as determined by BCA Protein Assay, were solubilized in 200 µL lysis buffer (12 mM sodium lauroyl sarcosine, 0.5% sodium deoxycholate, 50 mM triethylammonium bicarbonate (TEAB)) followed by 10 min bath sonication and heating at 95°C for 5 min. The samples were then diluted to 0.5 mg total protein/mL with lysis buffer, then a 100 µL aliquot was treated with 5 mM tris(2-carboxyethyl) phosphine (TCEP) prepared in 50 mM aqueous TEAB at 60°C for 30 min. Next, the samples were treated with 10mM chloroacetamide, prepared in 50 mM TEAB, for 30 min at 25°C in the dark. Samples were diluted 5-fold in 50 mM TEAB, then incubated overnight with Sequencing Grade Modified Trypsin (1:100, □g trypsin: □g total protein). The next day, an equal volume of ethyl acetate/trifluoroacetic acid(TFA, 100/1, v/v) was added to samples, followed by 5 min vigorous vortexing and centrifugation (13,000 x g, 5 min). Desalting of samples was performed similar to that previously described.<sup>[3]</sup> Dried samples were reconstituted in acetonitrile/water/TFA (2/98/0.1, v/v/v), loaded onto a C18-silica disk (3M, Maplewood, MN, USA) placed inside a 200 µL pipet tip. Prior to sample loading onto the disk, it was equilibrated with methanol (20 µL), acetonitrile/water/TFA (20 µL, 80/20/0.1, v/v/v), then finally acetonitrile/water/TFA (2/98/0.1, v/v/v). The

samples loaded onto the disks were washed with acetonitrile/water/TFA (20  $\mu$ L, 2/98/0.1, v/v/v) and eluted with acetonitrile/water/TFA (40  $\mu$ L, 80/20/0.1, v/v/v). Eluents were concentrated under vacuum centrifugation and reconstituted in 10  $\mu$ L water/acetonitrile/formic acid, 98/2/0.1, v/v/v). 5  $\mu$ L aliquots were injected onto a reverse phase nanobore HPLC column (AcuTech Scientific, C18, 1.8  $\mu$ m particle size, 360  $\mu$ m x 20 cm, 150  $\mu$ m ID), equilibrated in water/acetonitrile/formic acid (98/2/0.1, v/v/v: min/%; 0/0, 5/3, 18/7, 74/12, 144/24, 153/27, 162/40, 164/80, 174/80, 176/0, 180/0) using an Eksigent NanoLC-2D system (Sciex, Framingham, MA, USA). The flow from the column was directed towards nanospray ionization source connected to a Q Exactive™ Hybrid Quadrupole-Orbitrap™ Mass Spectrometer (Thermo Fisher Scientific). Data-dependent mass spectra were acquired alternating between full scan ( $m/z$  350-2000, automated gain control target  $3 \times 10^3$ , 50 ms maximum injection time, FWHM resolution 70,000 at  $m/z$  200) and up to 10 MS/MS scans (quadrupole isolation of charge states  $\geq 1$ , isolation width 1.2 Th) with optimized fragmentation conditions (normalized collision energy of 32, dynamic exclusion of 30 s, AGC target  $1 \times 10^6$ , 100 ms maximum injection time, FWHM resolution 35,000 at  $m/z$  200). Analysis of raw data and peptide/protein identification of the antibody-photoCORM conjugates was performed using Mascot to search the UniProt-Mouse database. Common Contaminants database was also searched to identify streptavidin. Probability based scoring was used to determine significance of data, where reported scores =  $-10 \times \text{Log}_{10}(P)$ , where P is the absolute probability that the observed match between the experimental data and the database sequence is a random event.<sup>[4,5]</sup> Scores  $>67$  are considered significant ( $p < 0.05$ ).<sup>[4,5]</sup> Complex 1 associated with Ab-photoCORM was observed in the full MS scan data (Figure S6).

## Cell culture

Ovarian cancer cell lines OVCAR-5 and SKOV-3 were obtained from American Type Culture Collection (Manassas, VA, USA). OVCAR-5 and SKOV-3 were grown in RPMI 1640 Medium (11875119, ThermoFisher Scientific) supplemented with 10% fetal bovine serum (FBS, 16000) and 100 U/mL penicillin-streptomycin (15070063) were all purchased from ThermoFisher Scientific. Cells were passaged  $\leq 10$  times after acquisition from the manufacturer.

## Cell Viability (MTT) Assay

Cell viability was assessed by the cellular reduction of tetrazolium dye MTT performed in 96-well tissue culture plates.  $2 \times 10^3$  cells/well were allowed to seed overnight in a 37 °C incubator + 5% CO<sub>2</sub>. The following day, cells were treated as indicated with Complex 1 or Complex 2, then assessed for viability 24 h post-treatment. Following removal of cell culture media, 0.5 mg/mL MTT dissolved in fresh 1 $\times$  DMEM was added and allowed to incubate for 2 h in a 37 °C incubator + 5% CO<sub>2</sub>. Cell viability was quantified by measuring the relative amount of MTT reduced to insoluble formazan. Following solubilization of formazan in 10% SDS

+ 0.01 N HCl, formazan was measured by taking the absorbance at 570 nm, reference wavelength taken at 690 nm.

### **Western Analysis**

Whole cell lysates were extracted using RIPA lysis buffer (150 mM NaCl, 5 mM EDTA pH 8.0, 50 mM Tris pH 8.0, 1% Triton X-100, 0.5% sodium deoxycholate, 1% SDS and 1× protease inhibitor cocktail. BCA Protein Assay assayed soluble fractions for total protein content. 20 µg of soluble cell lysates from samples were resolved on 10% SDS-PAGE gel and transferred to poly(vinylidene difluoride) (PVDF) membrane. All following blocking and antibody solutions were prepared in 1x PBS + 0.1% Tween 20. Membranes, following blocking in 5% nonfat dried milk for 18 h at 4°C, were probed with primary (1:1000 dilution) antibody overnight at 4°C and then horseradish peroxidase (HRP)-conjugated secondary (1:10,000 dilution) antibody for 1 h at 25°C. Immunofluorescent signals were amplified with Pierce ECL Plus Western blotting substrate (32132, ThermoFisher Scientific).

### **Live-cell Immunosorbent Assay**

2 x 10<sup>3</sup> cells/well of 96-well tissue culture plates were allowed to seed overnight at 37°C + 5% CO<sub>2</sub>. The next day, cells were treated as indicated with 0-10 µg/mL antibody-photoCORM conjugates (Ab-photoCORM), as measured by BCA Protein Assay. Immunosorbence of Ab-photoCORMs to the adherent live cells was allowed to occur for 60 min in the dark at 37°C + 5% CO<sub>2</sub>. α-Control Ab-photoCORM, utilizing control mouse IgG (sc-2025, Santa Cruz Biotechnology), was utilized as control to assess the specificity of the other antibody-photoCORM conjugates. Following incubation, the media was gently aspirated, followed by three 250 µL washes with 1X PBS in the dark to remove any non-specific binding. 100 µL fresh cell culture media was added, followed by illumination with low power, visible light for 30 min to trigger release of CO from any Ab-photoCORM present after immunosorbence and washing. Cell viability, as measured by the reduction of MTT, was assayed 24 h post-illumination of light.

### **Statistical Analysis**

Data are expressed as the mean ± standard error mean (range) or as percentage of control value where indicated. Comparisons between two groups were made using the Student's t-test. Comparisons between more than two groups were made using the One-way ANOVA/ Tukey's post hoc test. p-values < 0.05 were considered statistically significant. All calculations were performed using GraphPad Prism software package (GraphPad Software Inc., San Diego, USA).

### **Supporting References**

[1] M. Salmain, N. Fischer-Durand, L. Cavalier, B. Rudolf, J. Zakrzewski, G. Jaouen, *Bioconjug. Chem.* **2002**, *13*, 693-698.

[2] A. J. Atkin, J. M. Lynam, B. E. Moulton, P. Sawle, R. Motterlini, N. M. Boyle, M. T. Pryce, I. J. S. Fairlamb, *Dalton Trans.* **2011**, 40, 5755-5761.

[3] J. Rappsilber, M. Mann, Y. Ishihama, *Nat. Protoc.* **2007**, 2, 1896-1906.

[4] T. Koenig, B. H. Menze, M. Kirchner, F. Monigatti, K. C. Parker, T. Patterson, J. J. Steen, F. A. Hamprecht, H. Steen, *J. Proteome Res.* **2008**, 7, 3708-3717.

[5] D. J. C. Pappin, P. Hojrup, A. J. Bleasby, *Curr. Biol.* **1993**, 3, 327-332.
